# Supplementary material for: Runcaciguat, a novel soluble guanylate cyclase activator, shows renoprotection in hypertensive, diabetic, and metabolic preclinical models of chronic kidney disease
Source: PubMed Central journal article supplement (PMC8592982; doi:10.1007/s00210-021-02149-4), 2021-09-22

Figure 1 Supplement

BW

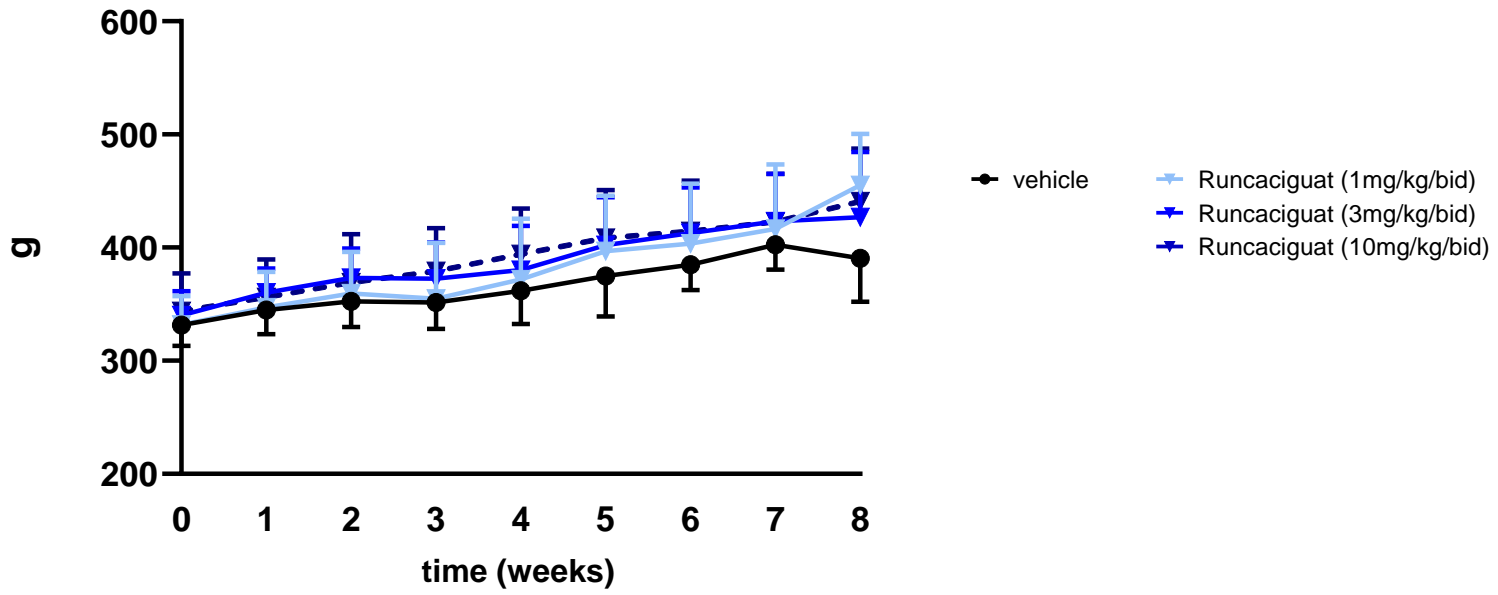

# Figure 2 Supplement

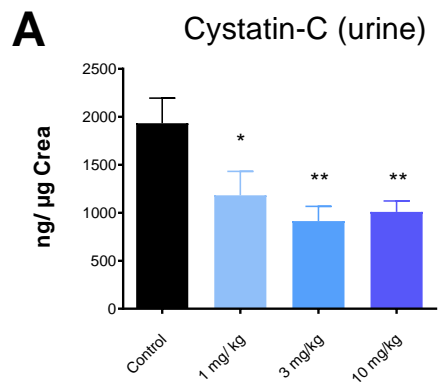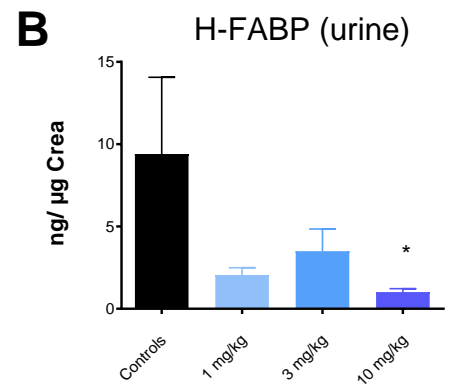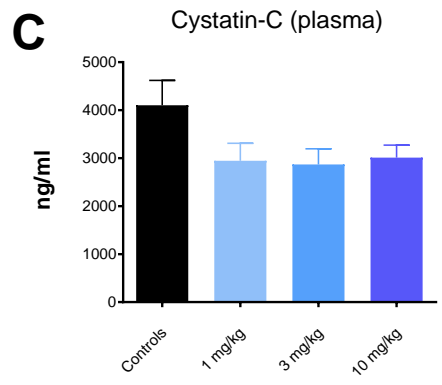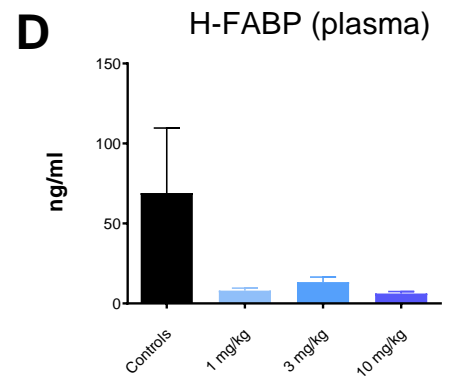

- vehicle
- Runcaciguat (1mg/kg/bid)
- Runcaciguat (3mg/kg/bid)
- Runcaciguat (10mg/kg/bid)

# Figure 3 Supplement

## Fraction shortening

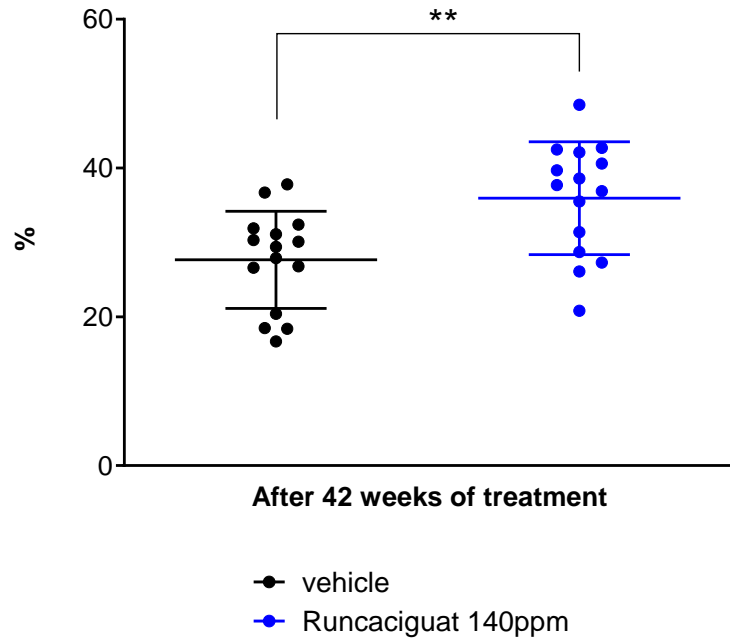

# Figure 4 Supplement

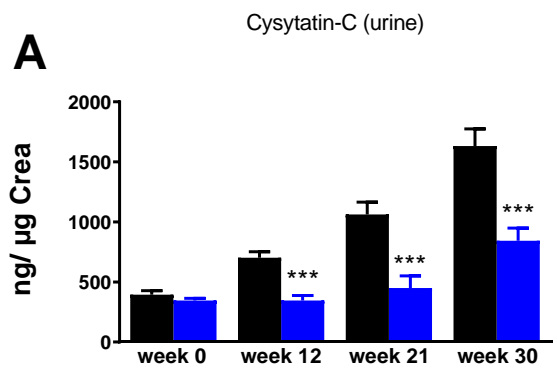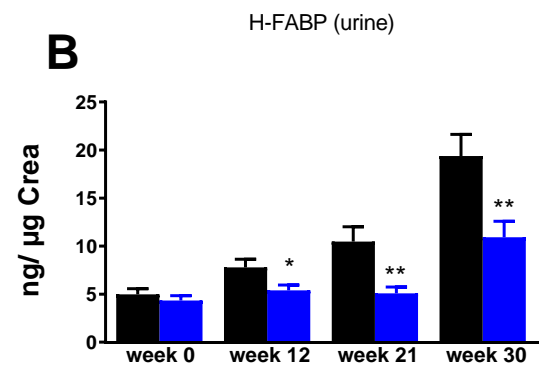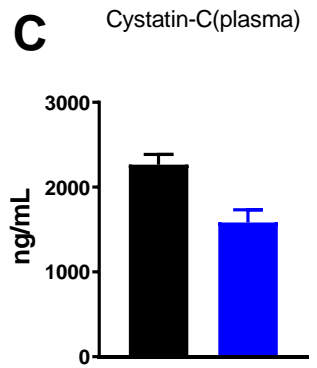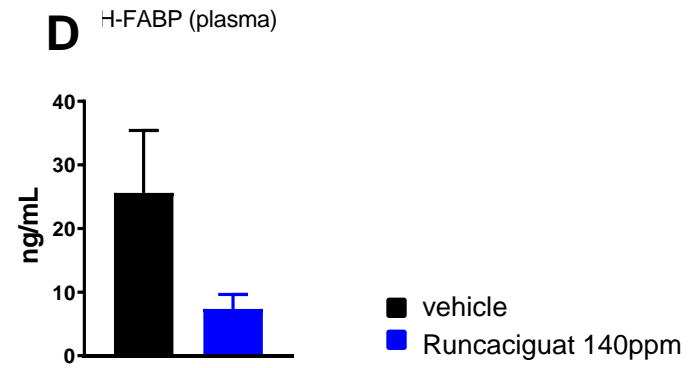

Supplement: 210_2021_2149_MOESM1_ESM.pdf [file 210_2021_2149_MOESM1_ESM.pdf]
